# Supplementary material
Source: Springer Nature journal article supplement (https://www.springermedizin.de/resource/supplementary/12958_2010_867_MOESM5_ESM.pdf/9569054)

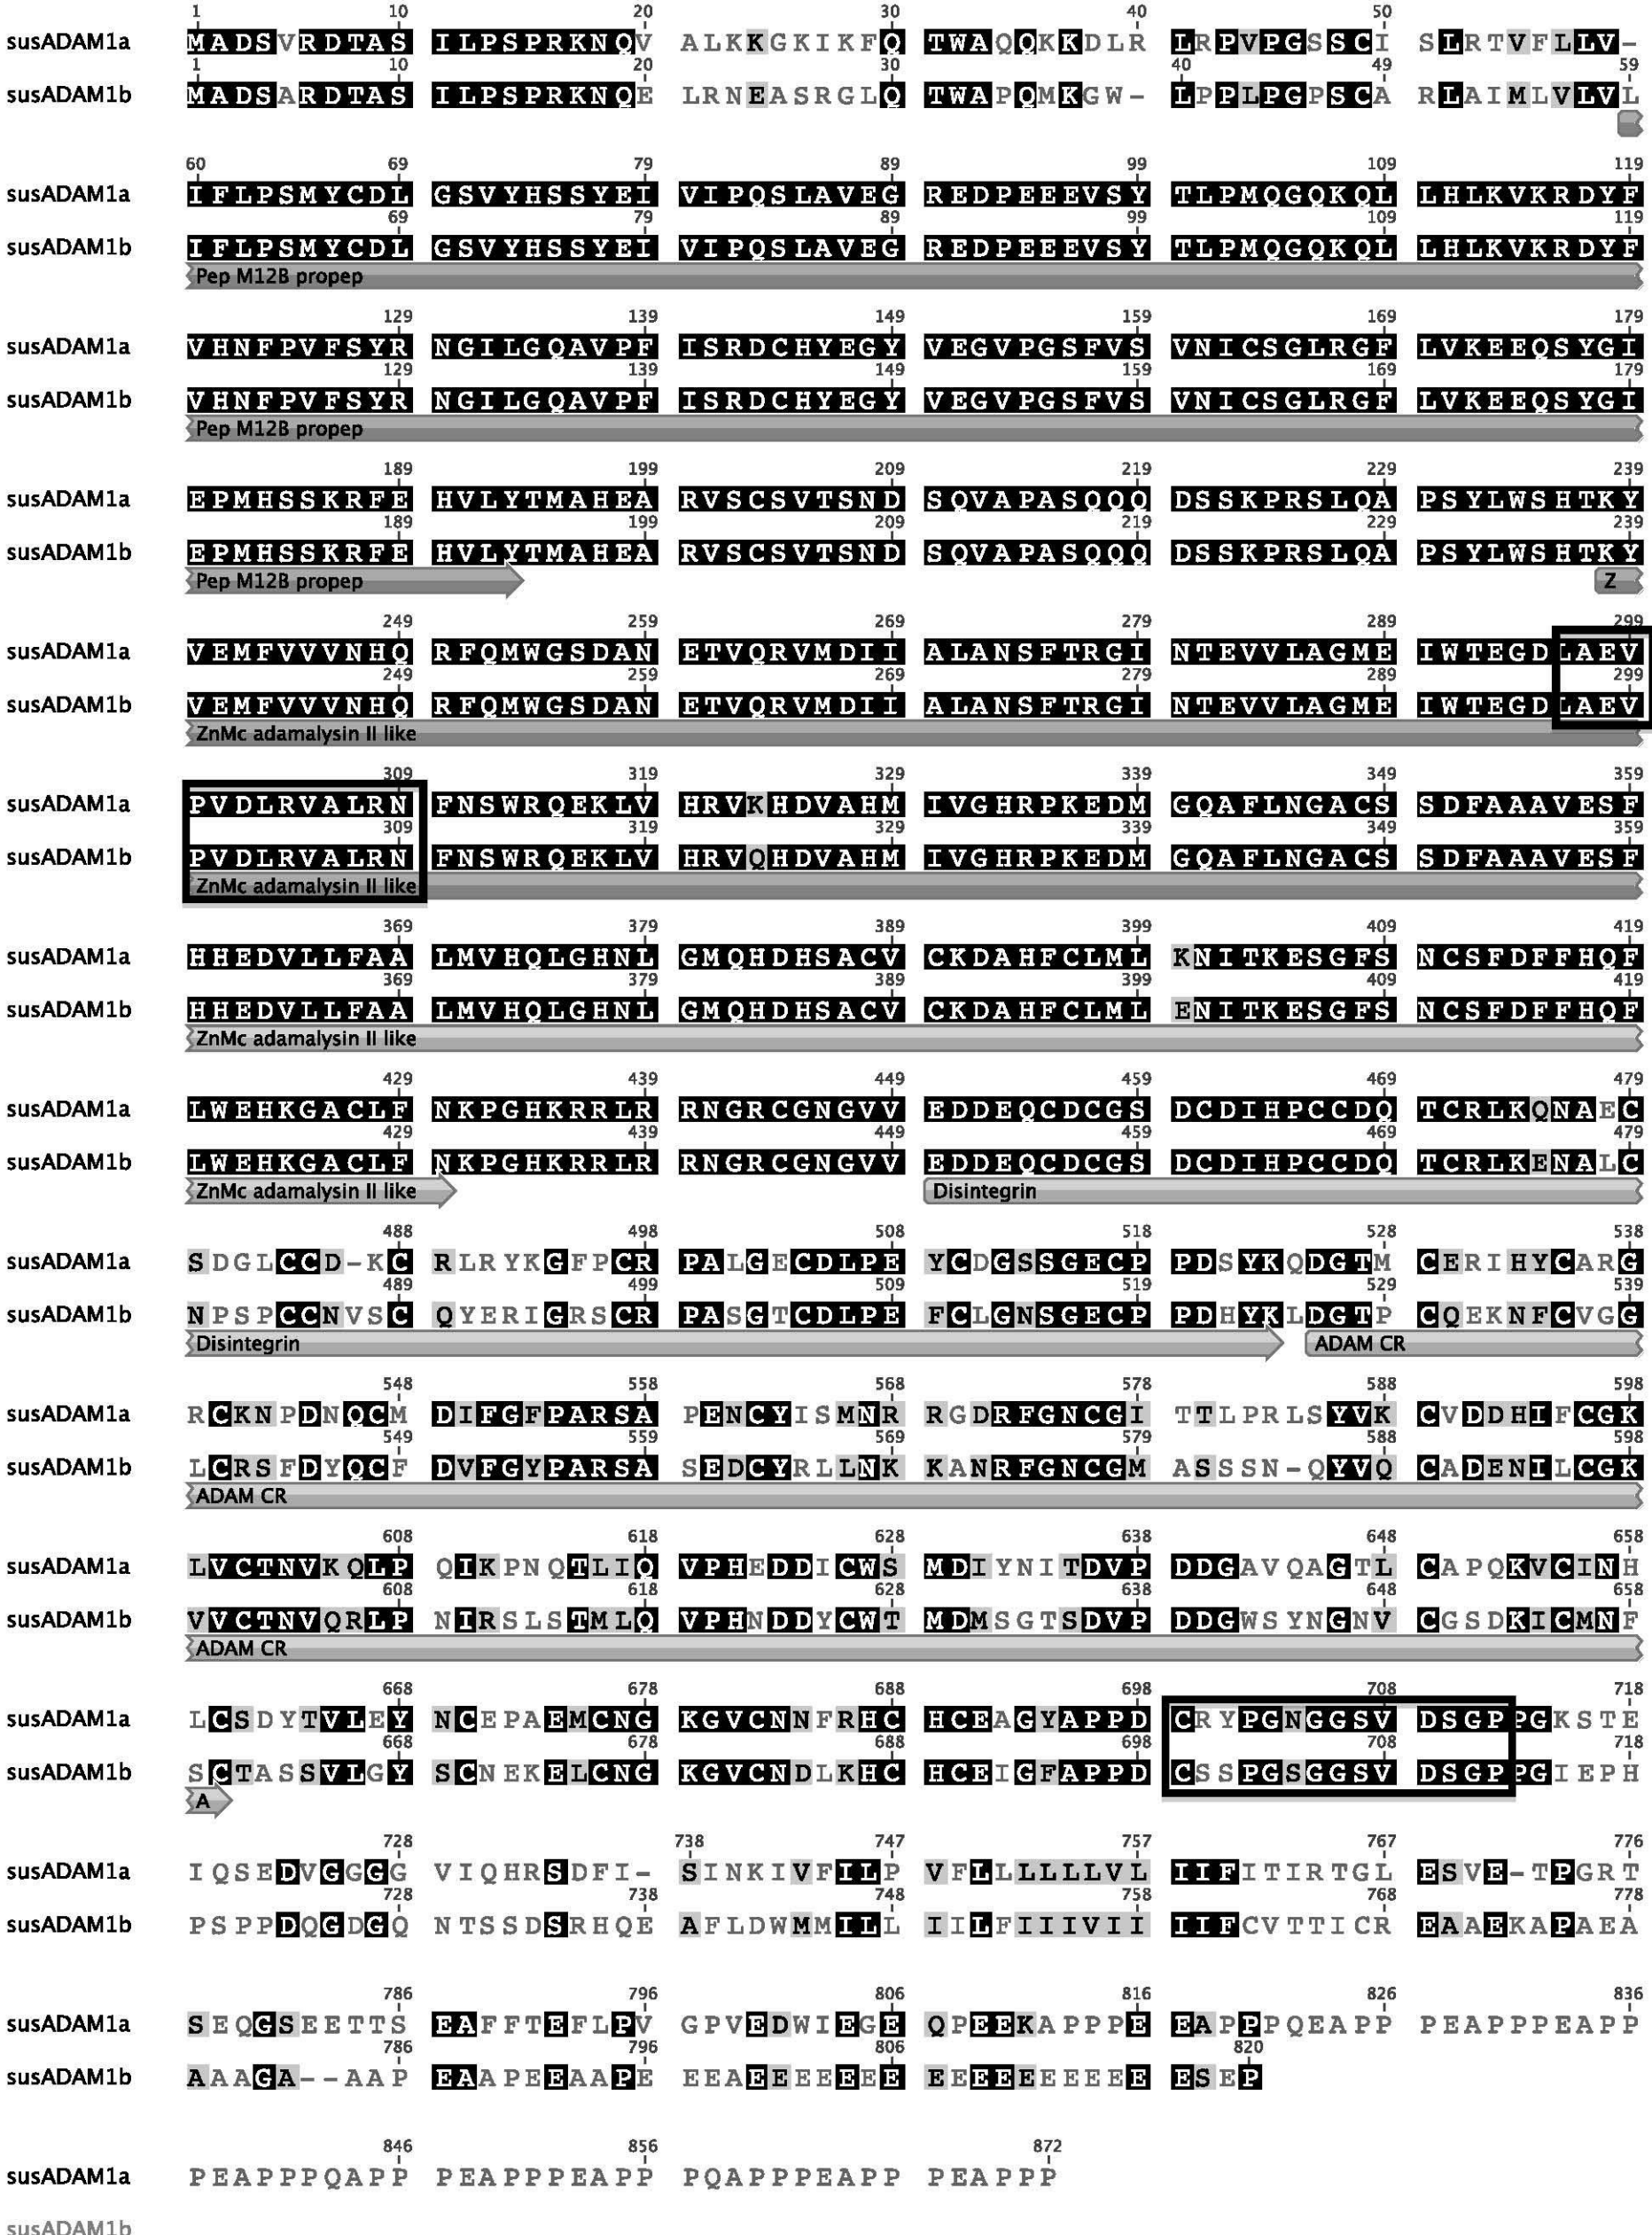

Figure 2

Supplement: MOESM5 [file 9569054]
